# Supplementary material for: Anti-obesity effects of red pepper (Capsicum annuum L.) leaf extract on 3T3-L1 preadipocytes and high fat diet-fed mice
Source: Royal Society of Chemistry journal article supplement (doi:10.1039/d2fo03201e), 2022-11-24

## Supplementary Figure 1. Blot of white adipose tissue

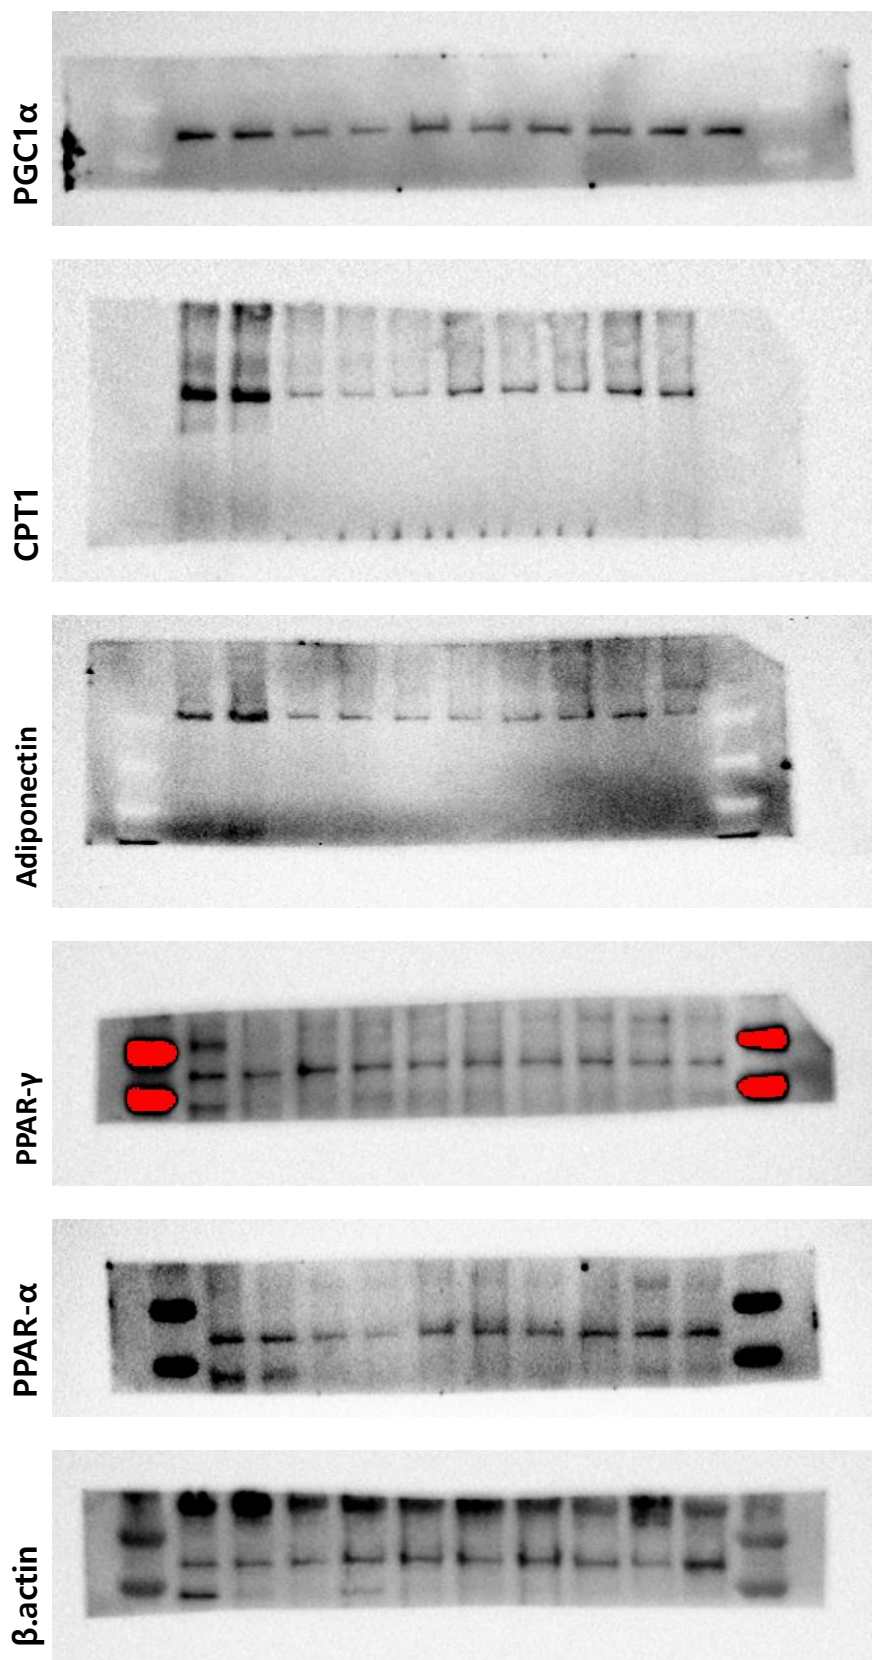

## Supplementary Figure 2. Blot of liver tissue

SREBP1

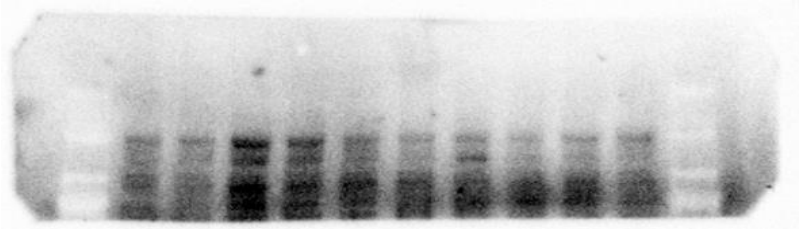

FAS

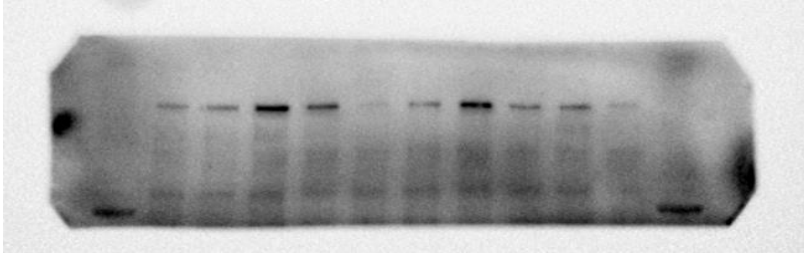

Chrebp

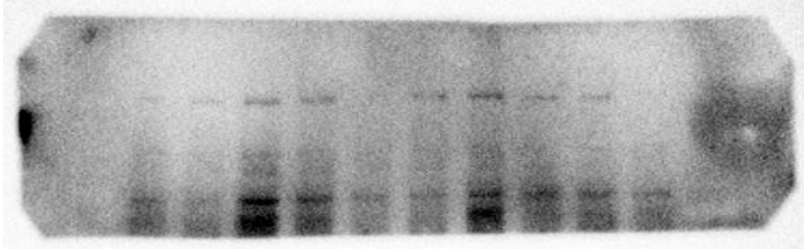

PPAR-γ

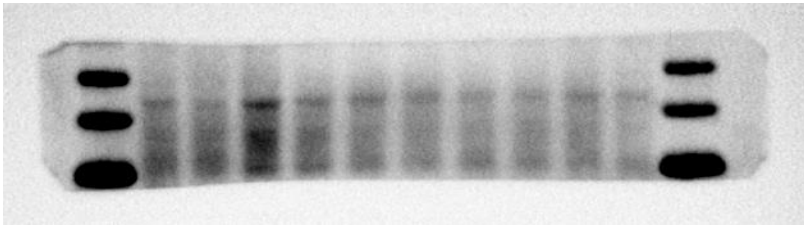

PPAR

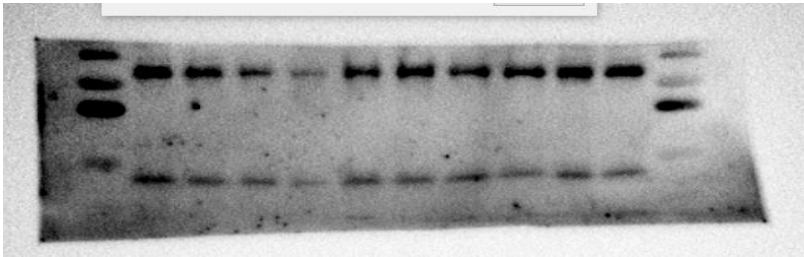

β.actin

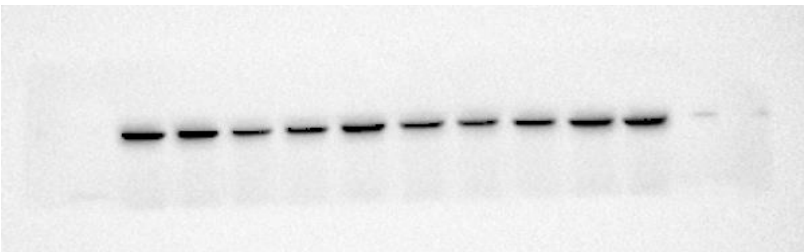

Supplement: d2fo03201e1.pdf [file d2fo03201e1.pdf]
