# Supplementary material for: Anti-obesity effects of red pepper (Capsicum annuum L.) leaf extract on 3T3-L1 preadipocytes and high fat diet-fed mice
Source: Royal Society of Chemistry journal article supplement (doi:10.1039/d2fo03201e), 2022-11-24
Supplement: d2fo03201e2.pdf [file d2fo03201e2.pdf]

1 **Anti-obesity effects of red pepper (*Capsicum annuum* L.) leaf extract on 3T3-L1**  
2 **preadipocytes and high fat diet-fed mice**

3

4 Mi-Jin Oh,<sup>a</sup> Hye-Bin Lee,<sup>a</sup> Guijae Yoo,<sup>a</sup> Miri Park,<sup>a</sup> Chang-Hyun Lee,<sup>b</sup> Inwook Choi,<sup>a</sup> and  
5 Ho-Young Park<sup>\*,a</sup>

6

7 <sup>a</sup> *Research Division of Food Functionality, Korea Food Research Institute, Jeollabuk-do*  
8 *55365, Republic of Korea*

9 <sup>b</sup> *Department of Anatomy, Woosuk University, Jeollabuk-do 54896, Jeollabuk-do 55338,*  
10 *Republic of Korea*

11

12

13

14 **Supplementary Data**

15

16 **Supplementary table 1.** List of compounds identified by MS spectrum.

| No. | Identification                                | T <sub>R</sub><br>(min) | Formula   | Adduct         | Neutral mass<br>( <i>m/z</i> ) | Observed<br>( <i>m/z</i> ) | Mass error<br>(ppm) |
|-----|-----------------------------------------------|-------------------------|-----------|----------------|--------------------------------|----------------------------|---------------------|
| 1   | Fuzinoside                                    | 0.5                     | C15H28O13 | -H, +Cl, +HCOO | 416.15299                      | 415.1447                   | -2.6                |
| 2   | Pentose                                       | 0.57                    | C5H10O5   | +HCOO, -H      | 150.05282                      | 195.0515                   | 2.7                 |
| 3   | Citric acid                                   | 0.64                    | C6H8O7    | -H             | 192.027                        | 191.0203                   | 3.2                 |
| 4   | Taxifolin                                     | 2.88                    | C15H12O7  | +HCOO          | 304.0583                       | 349.06                     | 1.0                 |
| 5   | Chlorogenic acid                              | 3.05                    | C16H18O9  | -H             | 354.09508                      | 353.0872                   | -1.6                |
| 6   | Turpinionosides E                             | 3.78                    | C19H32O8  | +HCOO, -H      | 388.20972                      | 433.2068                   | -2.6                |
| 7   | Maltose                                       | 4.09                    | C12H22O11 | -H, +Cl, +HCOO | 342.11621                      | 341.1089                   | -0.1                |
| 8   | Luteolin 7-apiosyl-(1->2)-glucoside           | 4.68                    | C26H28O15 | -H, +Cl        | 580.14282                      | 579.1362                   | 1.2                 |
| 9   | Quercetin 3-O-rhamnoside                      | 4.75                    | C21H20O11 | -H, +Cl        | 448.10056                      | 447.0935                   | 0.4                 |
| 10  | Apigenin-7-apiosylglucoside                   | 5.15                    | C26H28O14 | -H, +Cl, +HCOO | 564.14791                      | 563.1405                   | -0.2                |
| 11  | Luteolin 7-(2-O-apiosyl-6-O-malonyl)glucoside | 5.24                    | C29H30O18 | -H             | 666.1432                       | 665.1341                   | -1.9                |
| 12  | Apigenin 7-O-glucoside                        | 5.29                    | C21H20O10 | -H             | 432.10565                      | 431.0971                   | -3                  |
| 13  | Luteolin 7-O-β-D-(6"-acetyl)-glucopyranoside  | 5.35                    | C23H22O12 | -H             | 490.11113                      | 489.1029                   | -2                  |
| 14  | Apigenin 6-C-arabinoside 8-C-glucoside        | 5.74                    | C26H28O14 | -H             | 564.1479                       | 563.1301                   | -3.2                |
| 15  | Capsicoside A3                                | 5.92                    | C33H52O8  | +HCOO          | 576.36621                      | 621.3619                   | -3.3                |
| 16  | Luteolin                                      | 6.44                    | C15H10O6  | -H             | 286.04774                      | 285.0406                   | 0.4                 |
| 17  | Apigenin                                      | 7.23                    | C15H10O5  | -H             | 270.05282                      | 269.0457                   | 0.6                 |
| 18  | Capsianoside I                                | 7.42                    | C32H52O14 | -H             | 660.3357                       | 659.3331                   | -4.2                |
| 19  | Capsianoside II                               | 7.57                    | C50H84O25 | -H             | 1084.5301                      | 1083.5071                  | 0.9                 |
| 20  | Andrographatoside                             | 8.18                    | C26H42O9  | -H, +HCOO      | 498.28288                      | 497.2754                   | -0.5                |
| 21  | Terrestrosin B                                | 9.71                    | C45H74O17 | +Cl            | 886.4926                       | 921.4697                   | 8.3                 |
| 22  | Methyl 7,10-hexadecadienoate                  | 10.25                   | C17H30O2  | +HCOO          | 266.22458                      | 311.2222                   | -1.8                |
| 23  | trans-p-Feruloyl-β-D-glucopyranoside          | 17.98                   | C16H32O2  | -H             | 256.24023                      | 255.233                    | 0.3                 |
| 24  | Octadeca-carboxylic acid                      | 19.39                   | C18H36O2  | -H             | 284.27153                      | 283.2639                   | -1.3                |

17

18 **Supplementary table 2.** Culture medium pH for different probiotic bacteria of water-soluble from pepper leaves extract (PLE) or inulin after  
 19 incubation for 0–24 h.

| Concentration (%)                   | CON                  |                      | Inulin               |                       | PLE                  |                      |                      |                      |
|-------------------------------------|----------------------|----------------------|----------------------|-----------------------|----------------------|----------------------|----------------------|----------------------|
|                                     | 0                    | 24                   | 0                    | 24                    | 0                    | 24                   | 0                    | 24                   |
| <i>Lacticaseibacillus paracasei</i> | 6.9±0.1 <sup>b</sup> | 6.8±0.2 <sup>c</sup> | 6.9±0.1 <sup>a</sup> | 6.6±0.0 <sup>b</sup>  | 6.8±0.1 <sup>a</sup> | 6.5±0.1 <sup>a</sup> | 6.8±0.1 <sup>a</sup> | 6.3±0.1 <sup>a</sup> |
| <i>Lactococcus lactis</i>           | 7.0±0.1 <sup>c</sup> | 6.9±0.1 <sup>b</sup> | 6.9±0.1 <sup>b</sup> | 6.6±0.1 <sup>b</sup>  | 6.9±0.1 <sup>a</sup> | 6.5±0.1 <sup>a</sup> | 6.9±0.1 <sup>a</sup> | 6.3±0.1 <sup>a</sup> |
| <i>Bifidobacterium bifidum</i>      | 7.1±0.1 <sup>d</sup> | 6.9±0.1 <sup>c</sup> | 7.0±0.1 <sup>b</sup> | 6.5±0.2 <sup>ab</sup> | 7.0±0.0 <sup>a</sup> | 6.4±0.0 <sup>b</sup> | 7.0±0.0 <sup>a</sup> | 6.4±0.0 <sup>b</sup> |
| <i>Bifidobacterium longum</i>       | 7.0±0.1 <sup>b</sup> | 6.9±0.1 <sup>c</sup> | 7.0±0.1 <sup>b</sup> | 6.6±0.1 <sup>b</sup>  | 7.0±0.0 <sup>a</sup> | 6.5±0.1 <sup>a</sup> | 7.0±0.0 <sup>a</sup> | 6.2±0.1 <sup>a</sup> |

20

21
